# Supplementary material
Source: Springer Nature journal article supplement (https://www.springermedizin.de/resource/supplementary/12936_2013_3122_MOESM6_ESM.pdf/9546210)

# G6PD deficiency (%)

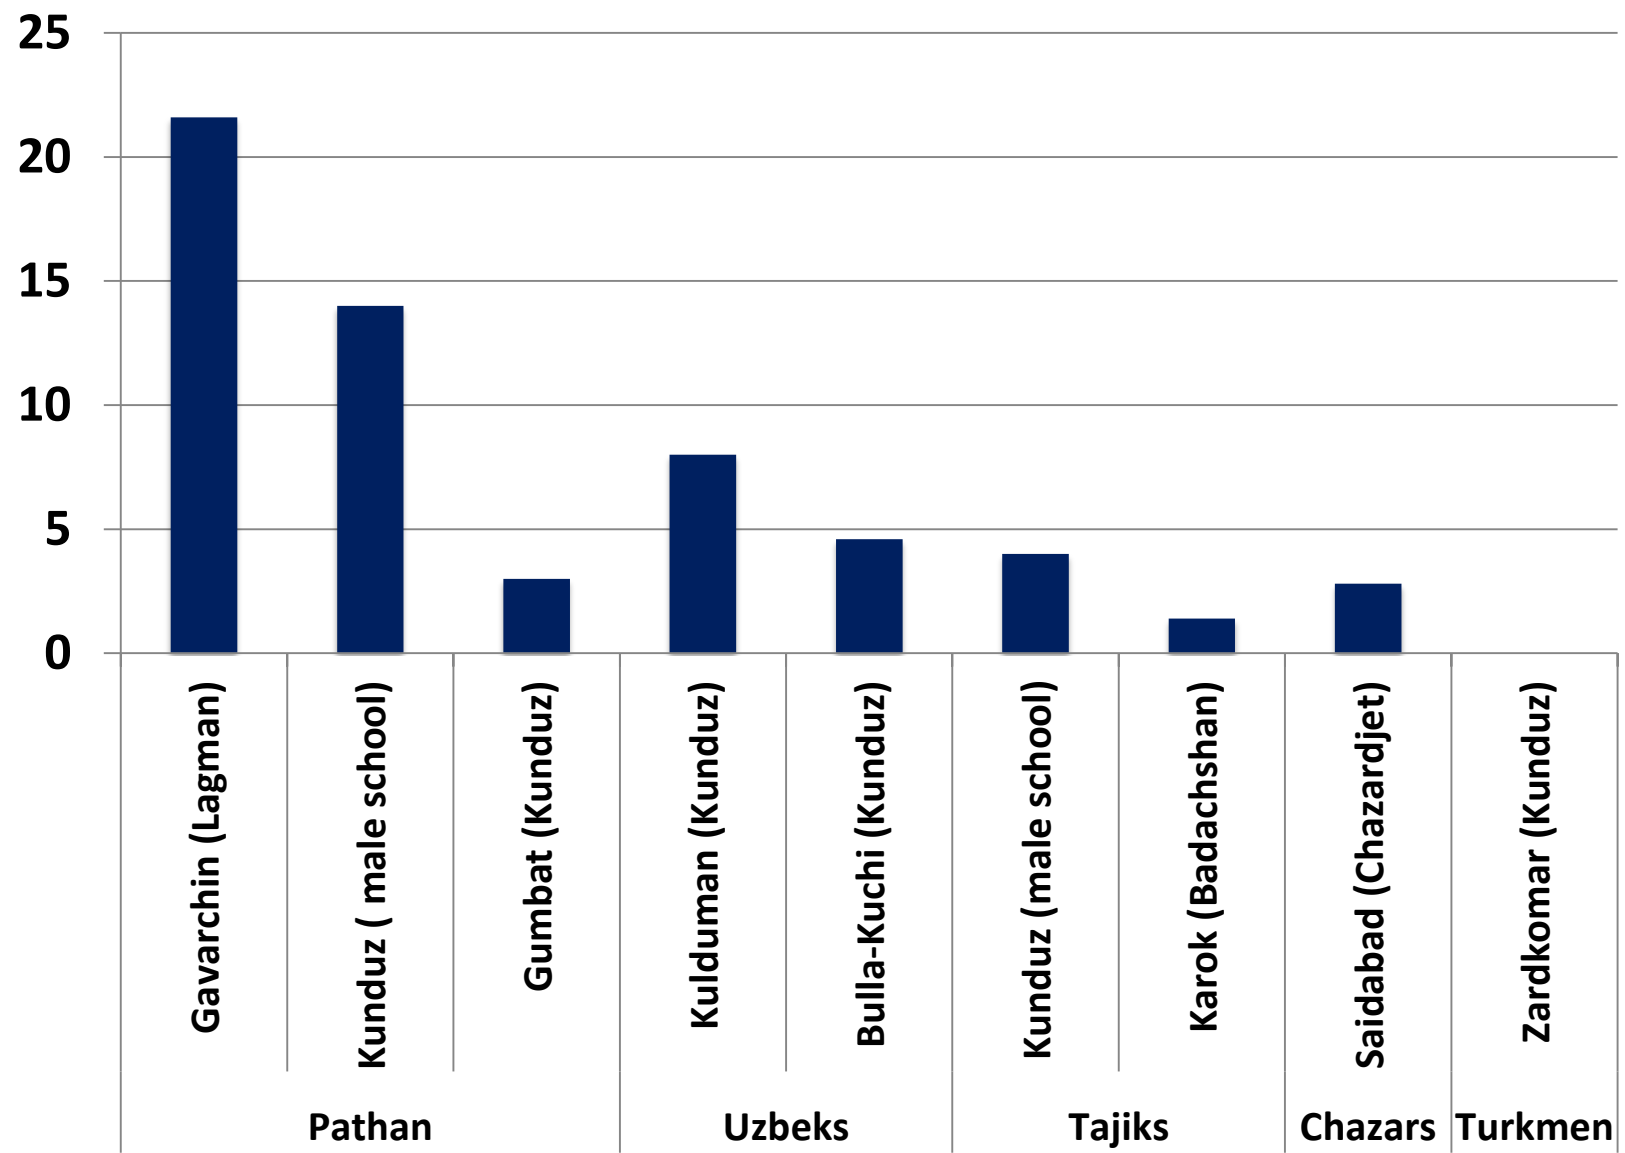

Supplement: MOESM6 [file 9546210]
